# Supplementary material for: Long-term outcomes and response to treatment in diacylglycerol kinase epsilon nephropathy
Source: PubMed Central journal article supplement (PMC7242908; doi:10.1016/j.kint.2020.01.045), 2020-06
Supplement: mmc1.pdf [file mmc1.pdf]

# Supplemental Figure 1: Individual value plots for laboratory findings

## A. Proteinuria at presentation

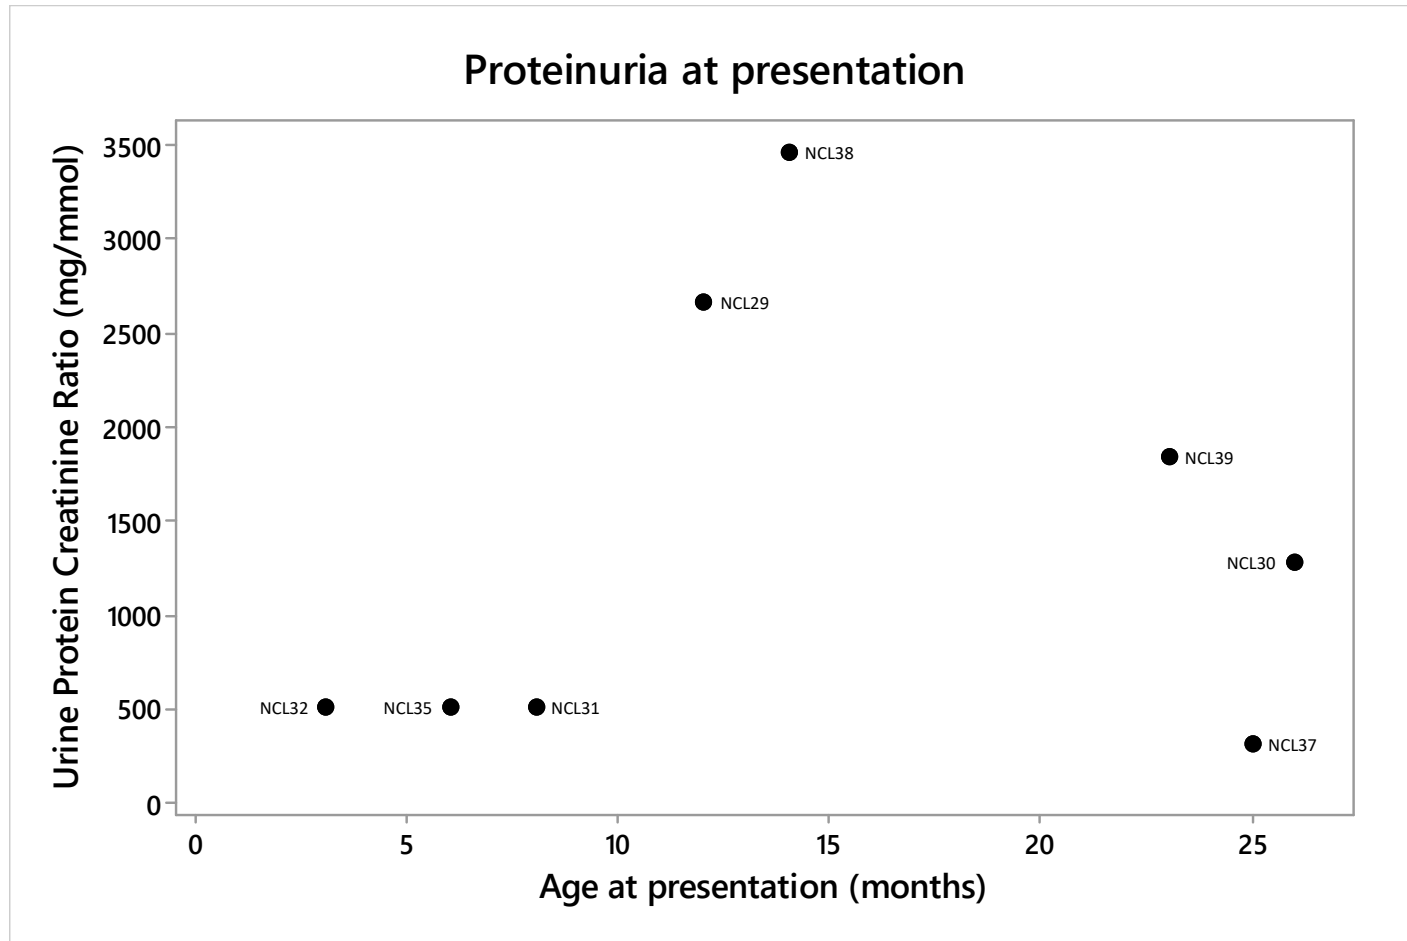

## B. Creatinine at presentation

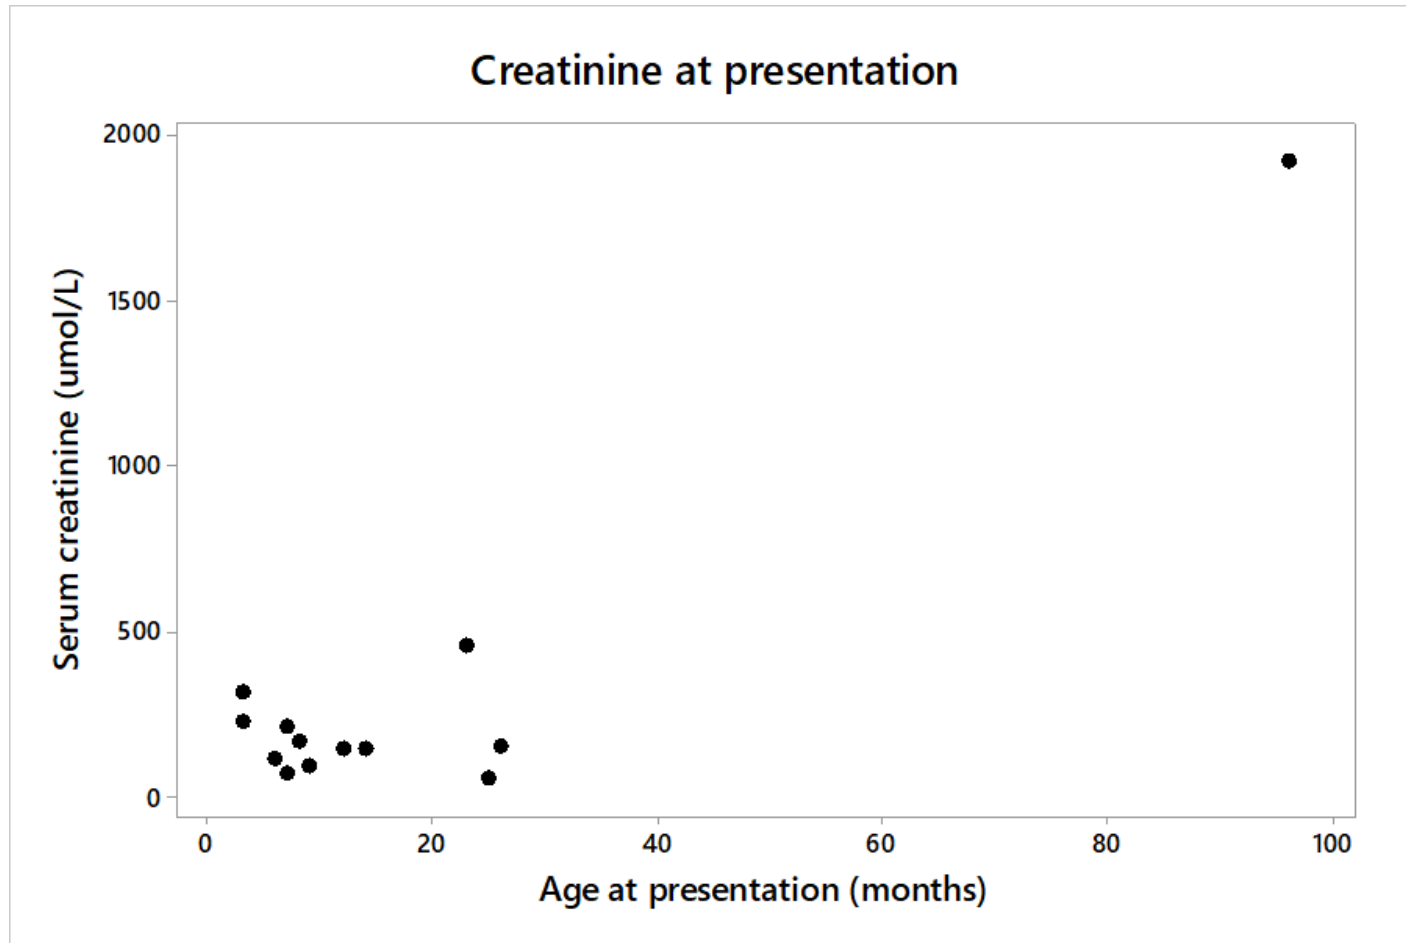

### C. Complement levels at presentation

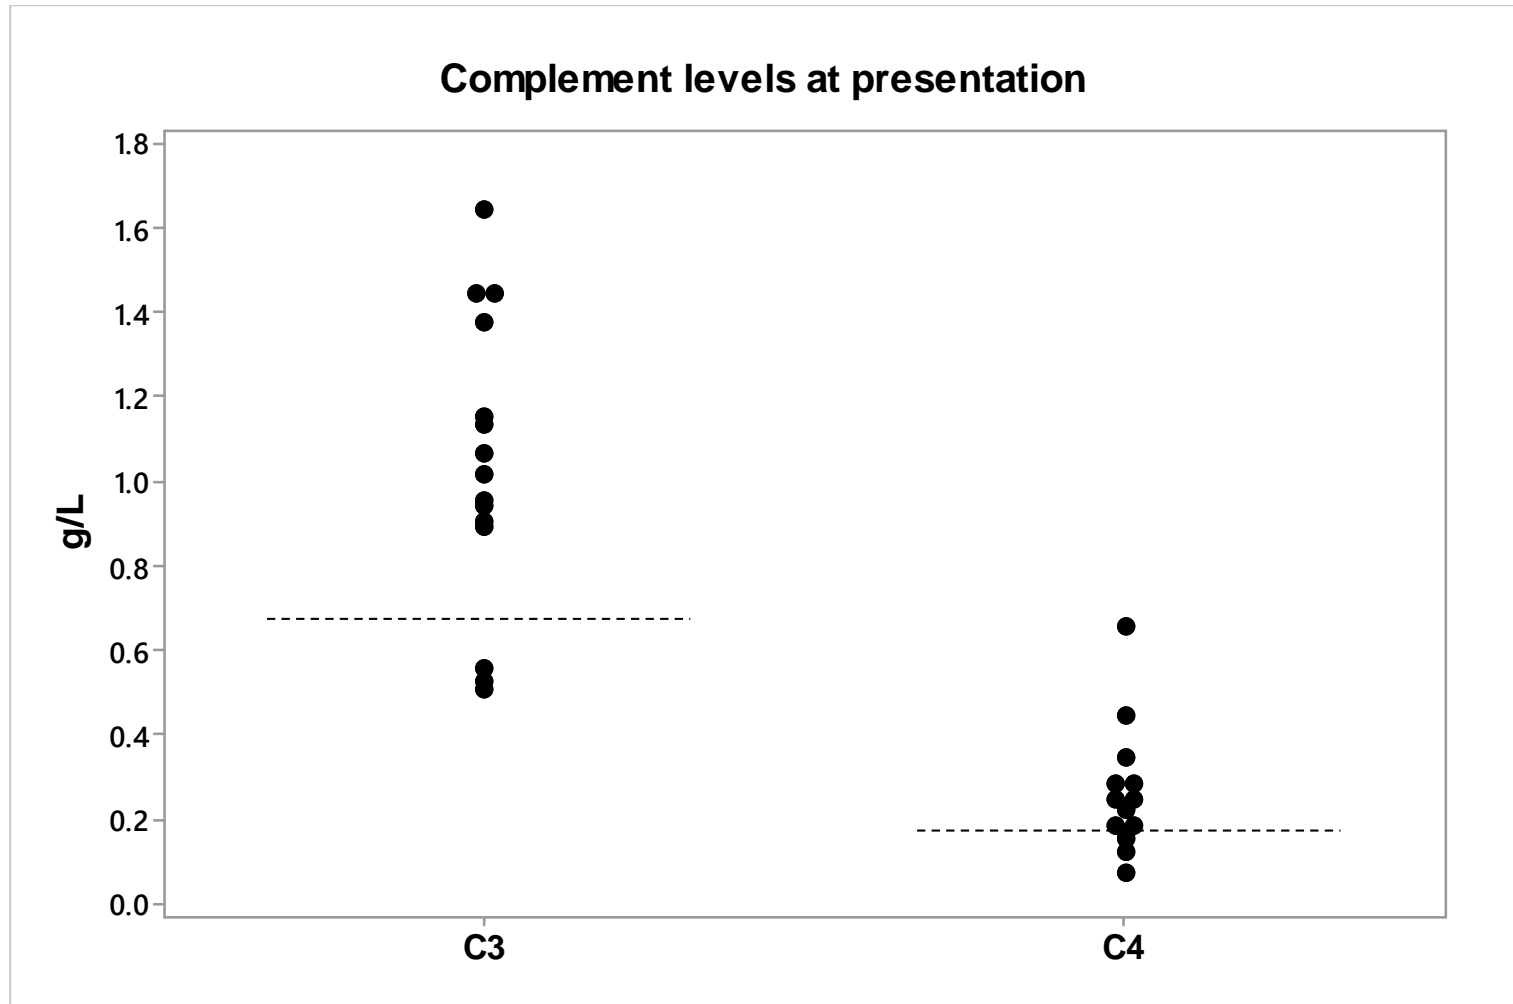

## Supplemental Figure 2: Pedigrees for familial cases

A: NCL25 (II:2)

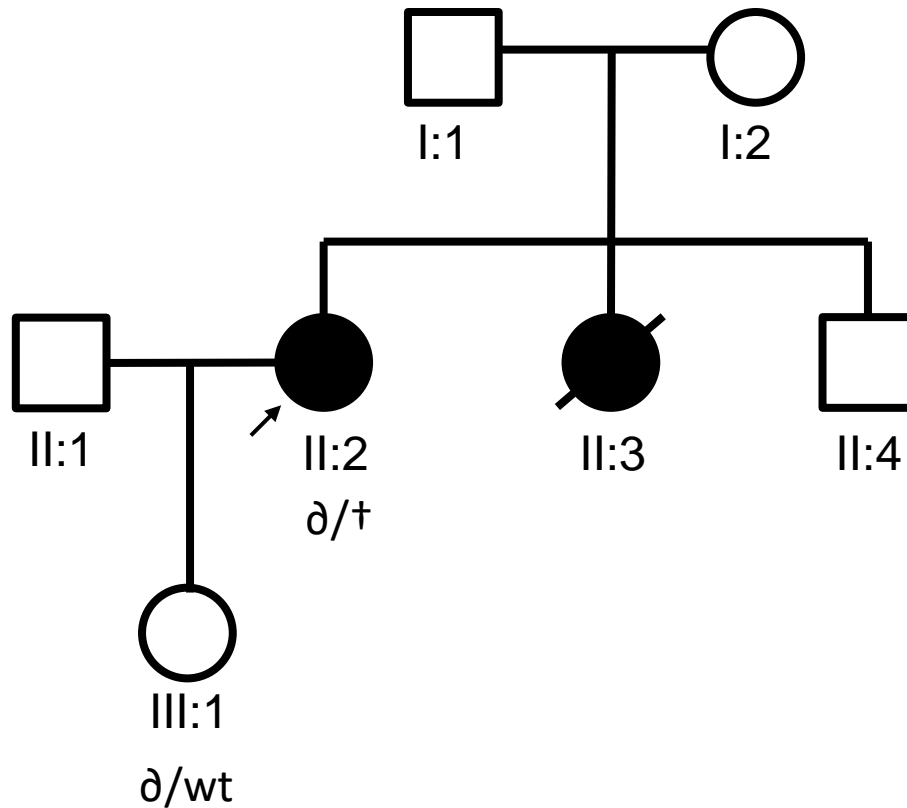

$\delta$  *DGKE* c.463A>G p.(Arg155Gly)  
 $\dagger$  *DGKE* c.1427T>C p.(Leu476Pro)  
wt: wild type

B: NCL26 (II:8)

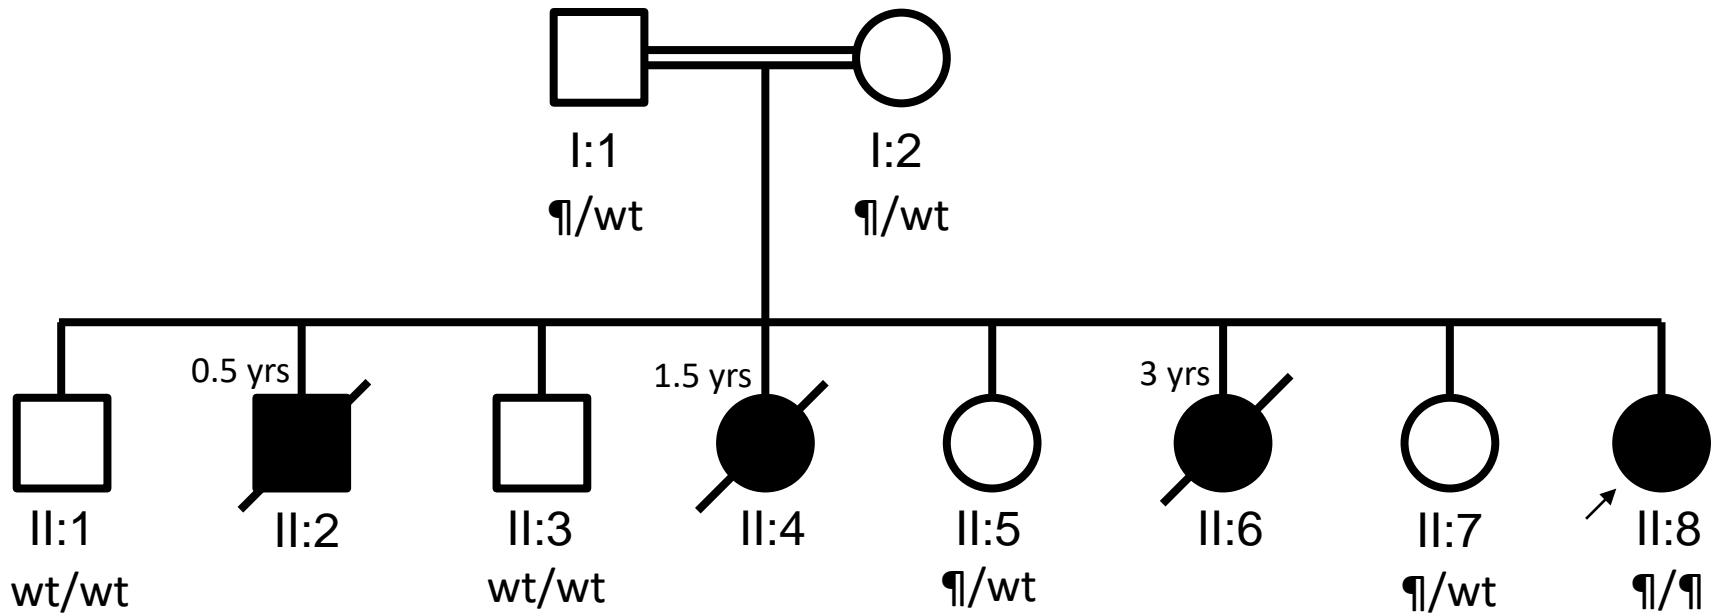

■ aHUS

yrs = age (years) when died

$\eta$  *DGKE* c.826delG p.(Val276Phefs\*8)

wt: wild type

## NCL26 pedigree: additional clinical information

### II:2

- Died aged 5 ½ months
- Death certificate recorded “Recurrent haemolytic uraemic syndrome and malignant hypertension”
- Blood tests before his death showed anaemia, kidney failure with a few fragments and burr cells, and thrombocytopenia
- Kidney biopsy showed very large quantities of fibrillary material between the basement membranes and endothelial cells, extending into mesangial areas and also some ‘formed, spherical, electron dense particles’ in places; appearances were felt to be consistent with HUS

### II:4

- Presented aged 3 ½ months with anaemia
- Presented aged 10 months with oedema and proteinuria; diagnosed with ‘mild HUS’
- Episode of oedema after a measles vaccination
- Presented aged 18 months with febrile episode, oedema and vomiting
  - Haemolysis and AKI
  - Consent was not given for dialysis
  - Deteriorated with convulsions, anuria, and AKI
  - Then had peritoneal dialysis but remained ill with poorly controlled hypertension and heart failure
  - Subsequently had a cardiac arrest and died

### II:6

- Presented aged 7 months with proteinuria and haemolysis
- HUS ‘gradually came under control’
- Relapse aged 3 years: presented with vomiting and diarrhoea
  - HUS was diagnosed 10 days later, complicated by pulmonary oedema, heart failure and *E. coli* urinary tract infection
- Relapse aged 3 years 6 months
  - Consent was not given for dialysis
  - Died 1 month later

C: NCL27 (III:1) and NCL29 (III:2)

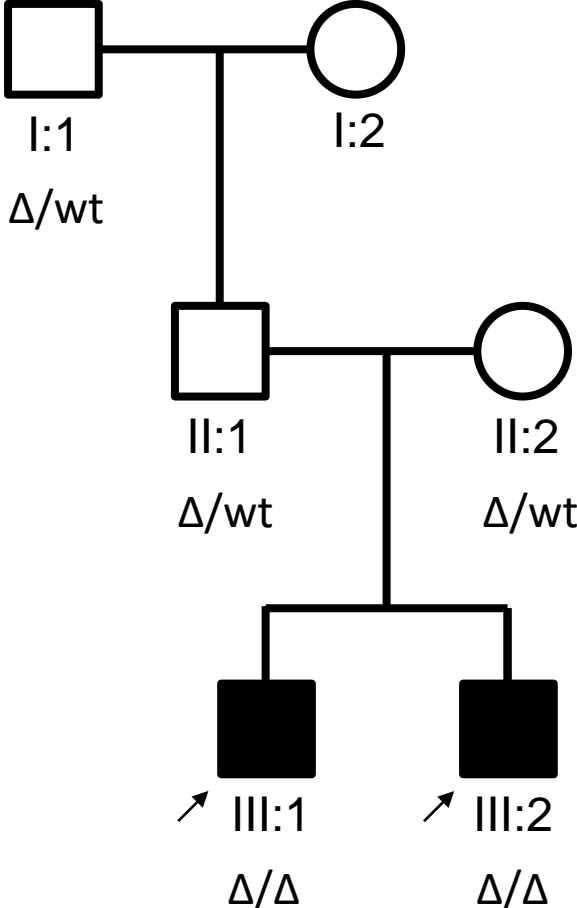

■ aHUS/MPGN

Δ *DGKE* c.1597A>C p.(Thr533Pro)  
wt: wild type

D: NCL34 (II:4)

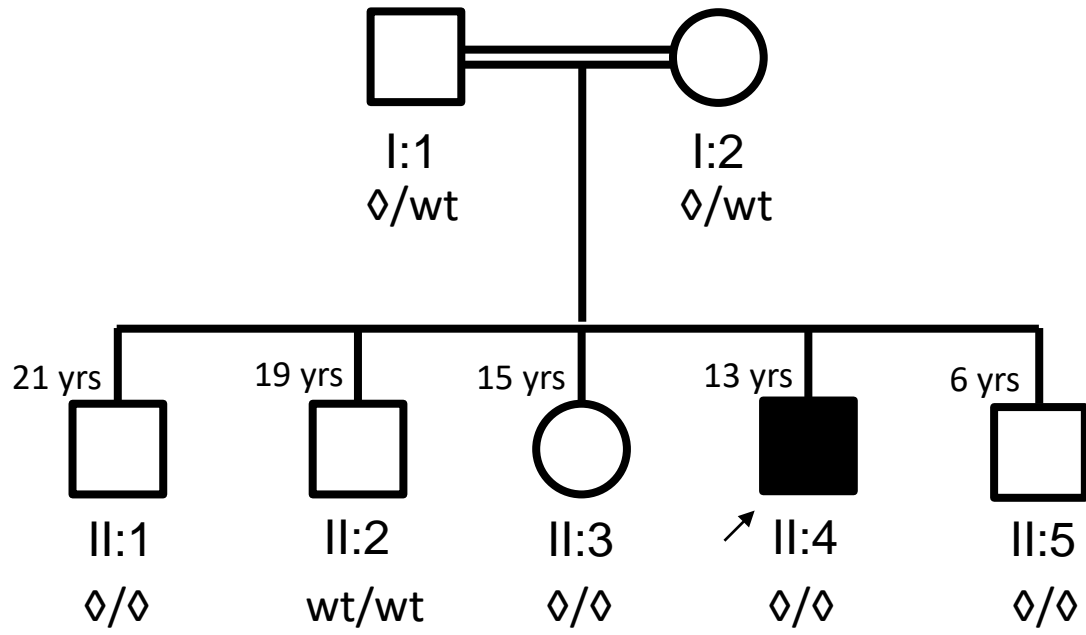

■ aHUS

yrs = current age (2019)

$\diamond$  *DGKE* c.1647\_1650delAACA p.(T550Mfs\*13)



# Supplemental Figure 3: Sanger sequencing traces

A. NCL25. a. *DGKE* exon 2. b. *DGKE* exon 11.

a.

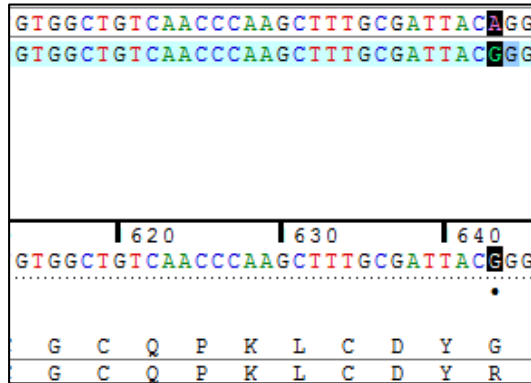

b.

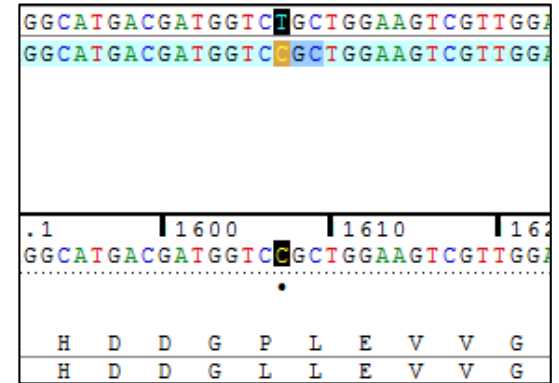

Reference sequence chromatogram

NCL25 chromatogram

*DGKE* c.463A>G p.(R155G)

*DGKE* c.1427T>C p.(L476P)

## B. NCL27. *DGKE* exon 12

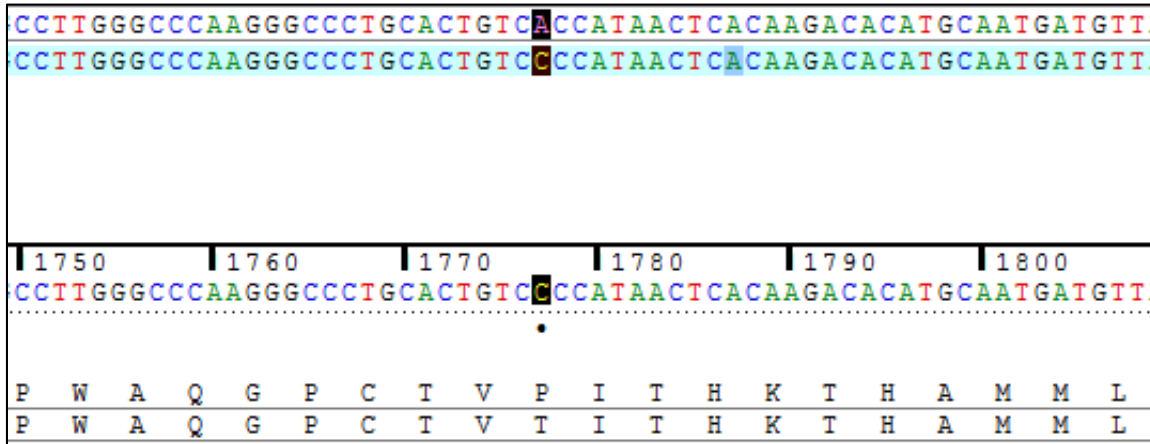

Reference base sequence  
NCL27 base sequence

NCL27 amino acid sequence  
Reference amino acid sequence

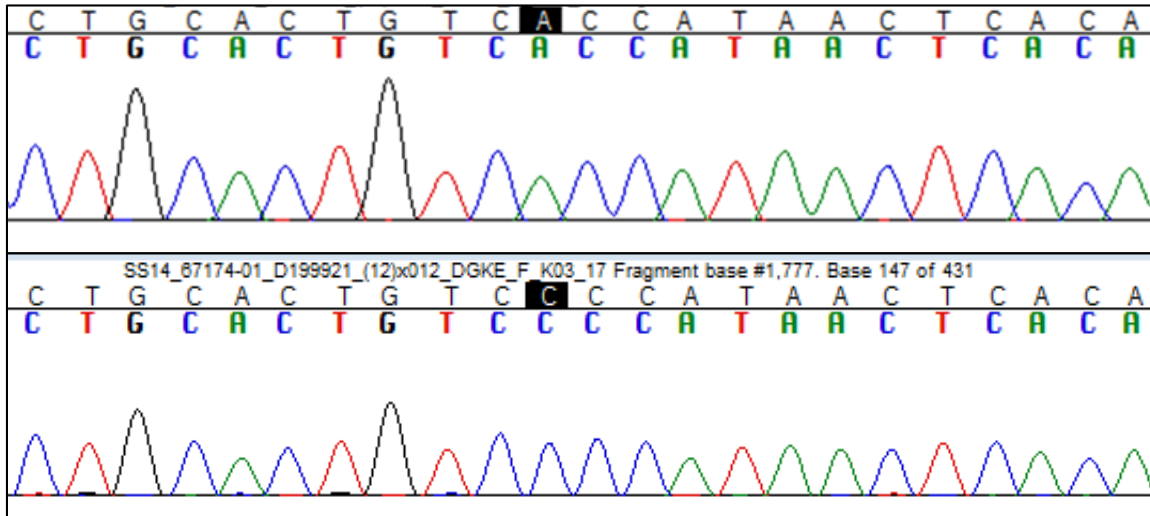

Reference sequence chromatogram

NCL27 chromatogram

↑  
*DGKE* c.1597A>C p.(T533P)

# C. NCL29. *DGKE* exon 12

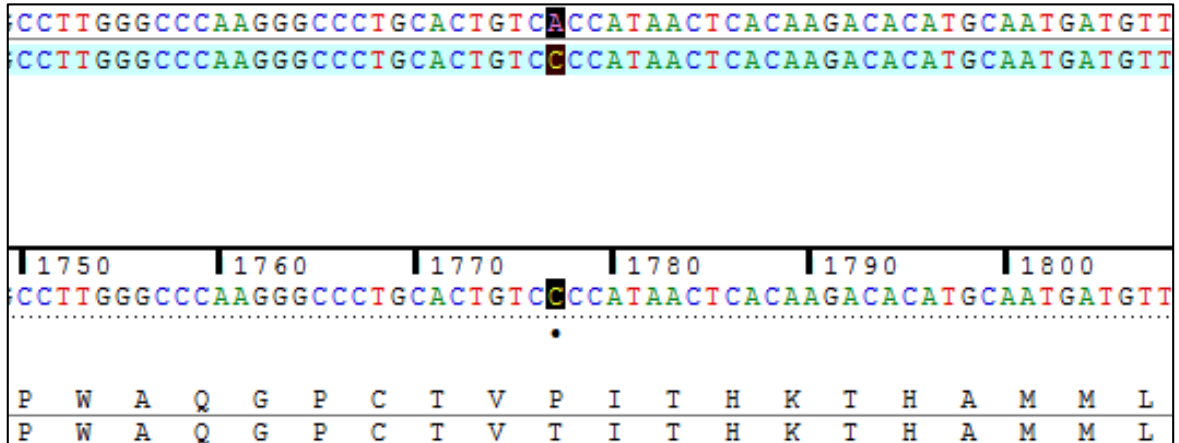

Reference base sequence  
 NCL29 base sequence

NCL29 amino acid sequence  
 Reference amino acid sequence

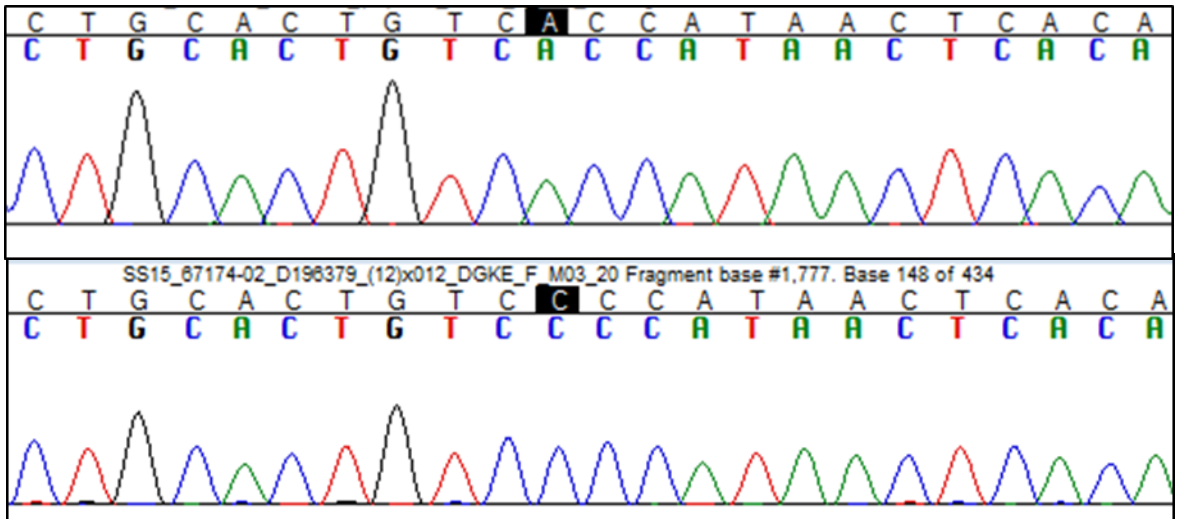

Reference sequence chromatogram

NCL29 chromatogram

↑  
*DGKE* c.1597A>C p.(T533P)

**D. NCL30. a. *DGKE* exon 2. b. *DGKE* exon 3.**

**a.**

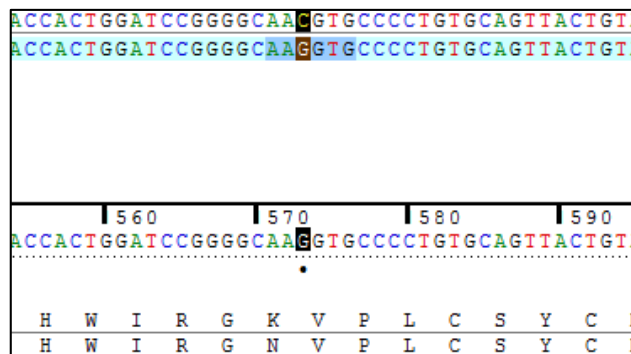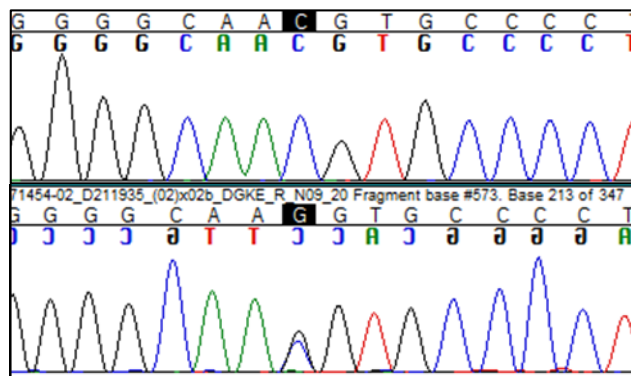

*DGKE* c.393C>G p (N131K)

**b.**

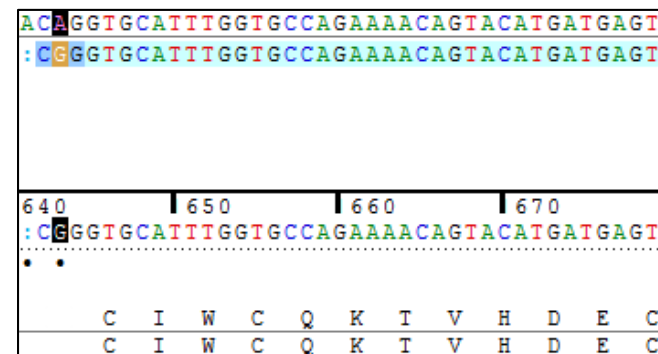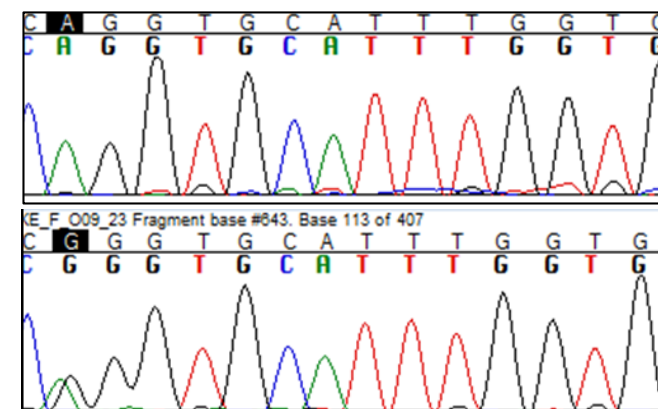

*DGKE* c.465-2A>G

# E. NCL31. *DGKE* exon 2

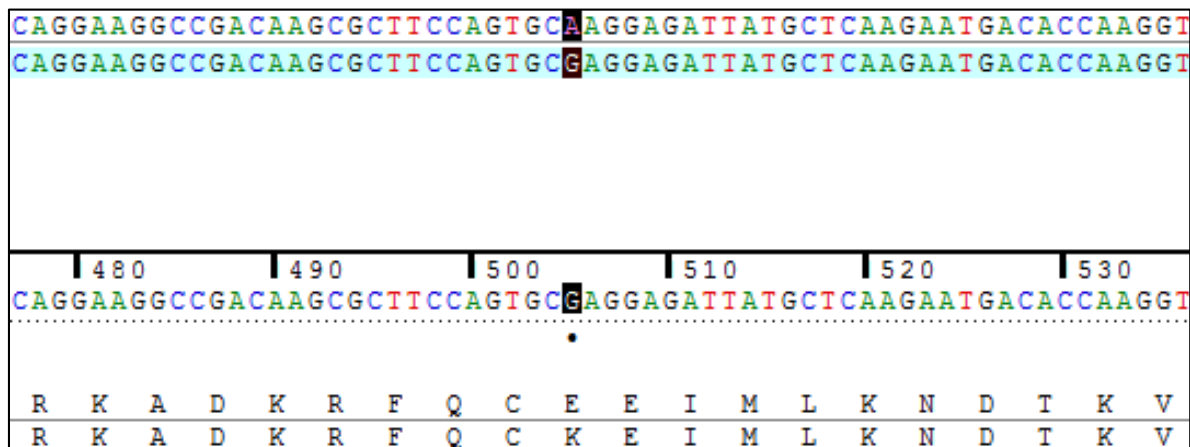

Reference base sequence  
NCL31 base sequence

NCL31 amino acid sequence  
Reference amino acid sequence

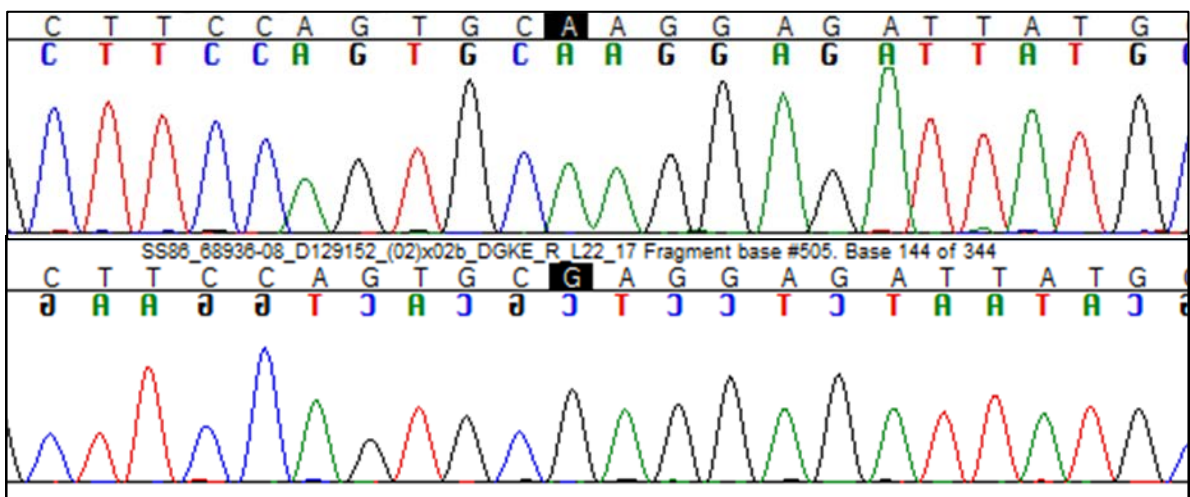

Reference sequence chromatogram

NCL31 chromatogram

↑  
*DGKE* c.325A>G p.(K109E)

# F. NCL33. *DGKE* exon 6

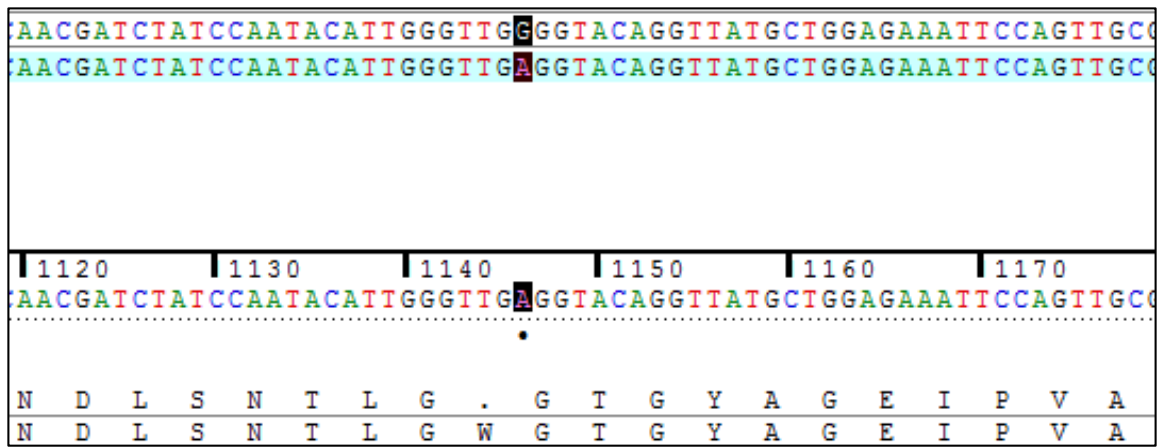

Reference base sequence  
 NCL33 base sequence

NCL33 amino acid sequence  
 Reference amino acid sequence

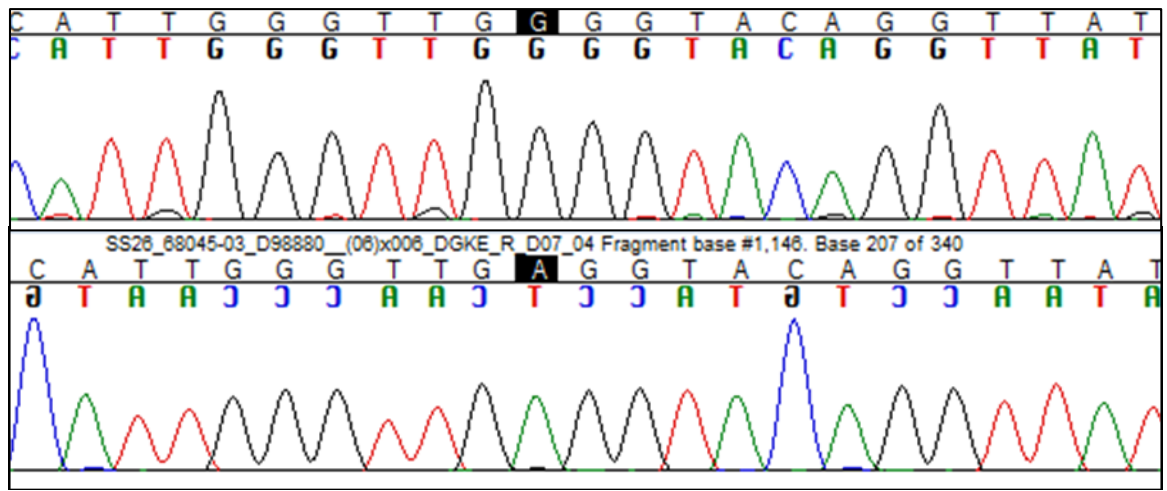

Reference sequence chromatogram

NCL33 chromatogram

↑  
*DGKE* c.966G>A p.(Trp322\*)

# G. NCL34. *DGKE* exon 12

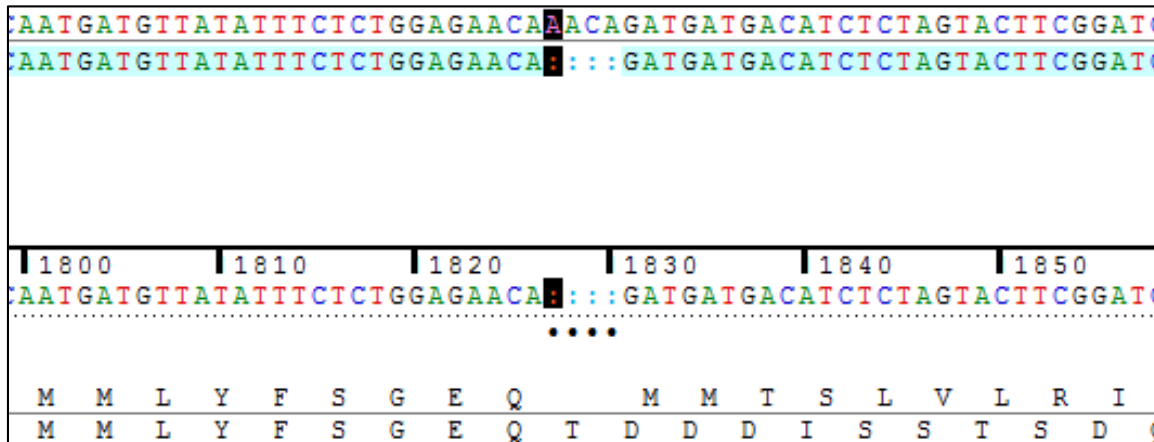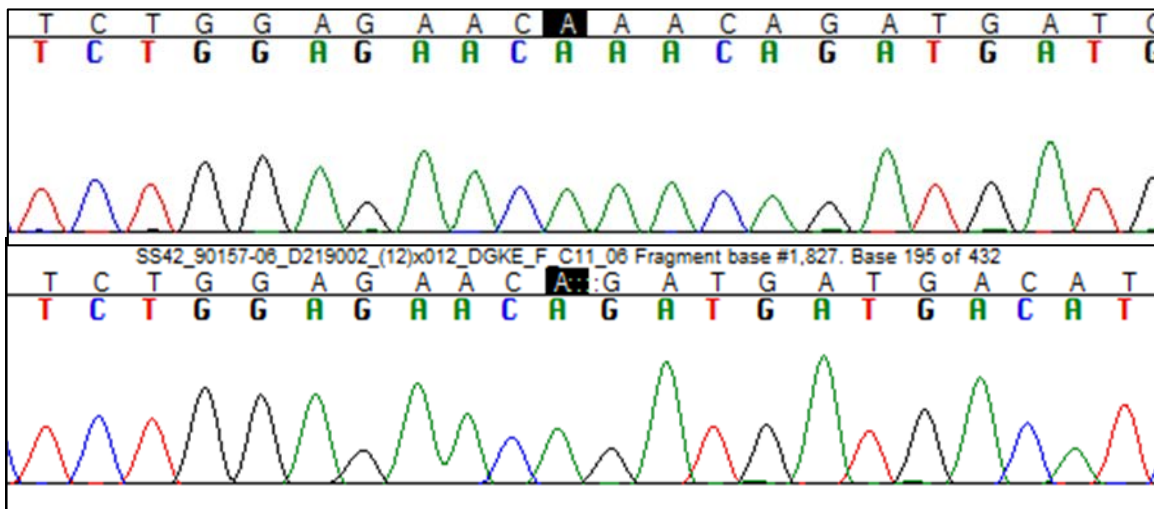

↑  
*DGKE* c.1647\_1650delAACA p.(T550Mfs\*13)

H. NCL36. a. *DGKE* exon 6. b. *DGKE* exon 11.

a.

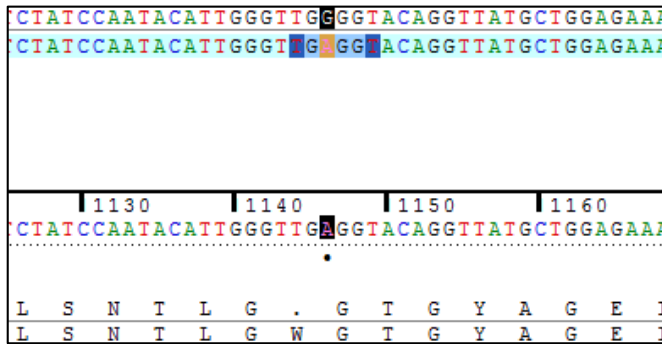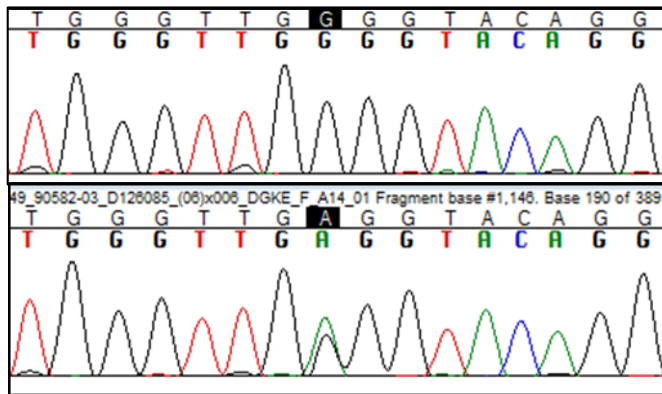

*DGKE* c.966G>A p.(Trp322\*)

b.

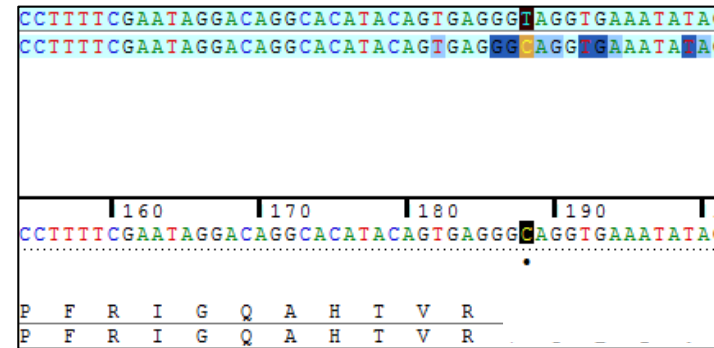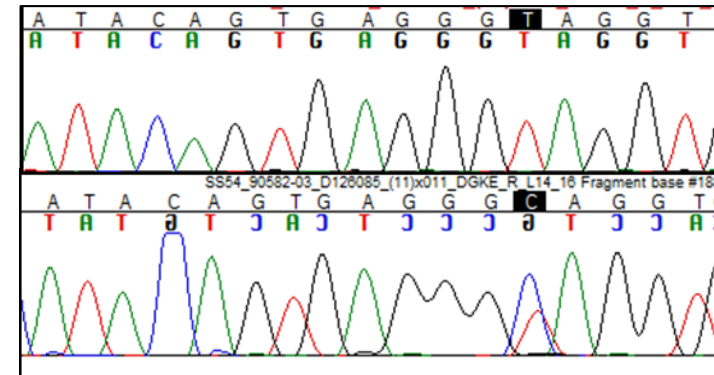

*DGKE* c.1524+2T>C



# I. NCL37. *DGKE* exon

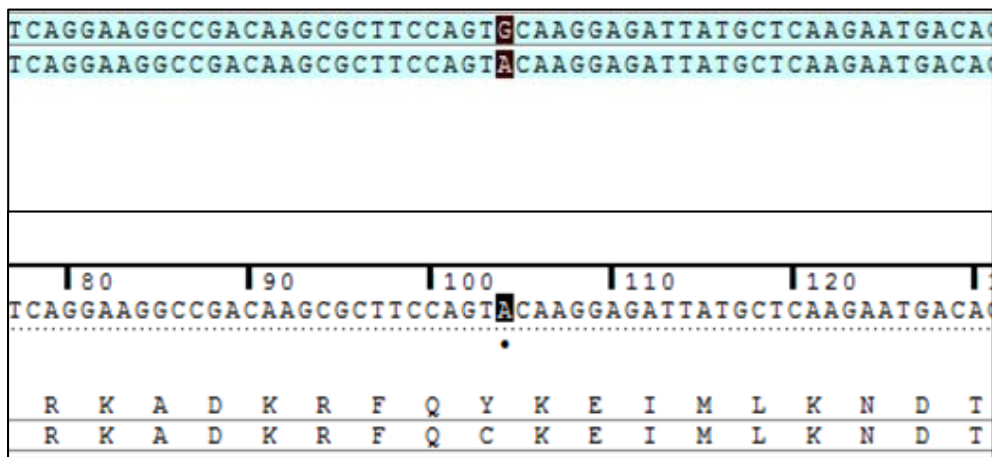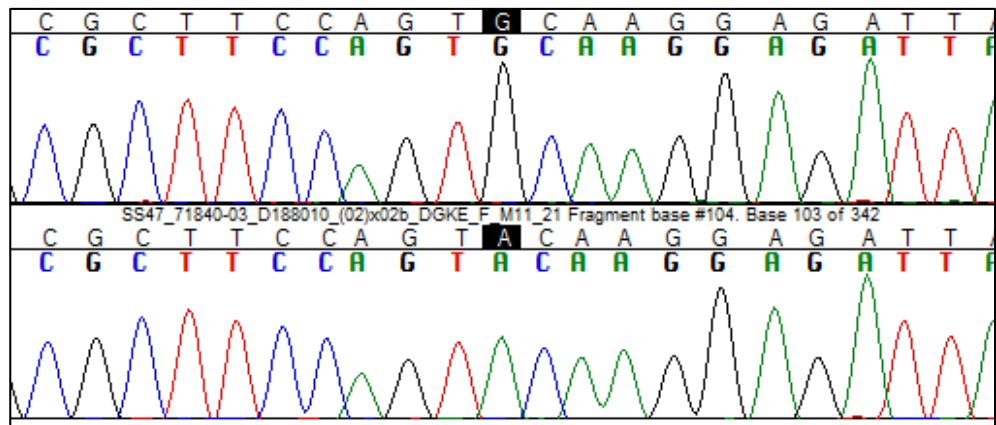

↑  
*DGKE* c.323G>A p.(C108Y)

# J. NCL38. *DGKE* exon 6

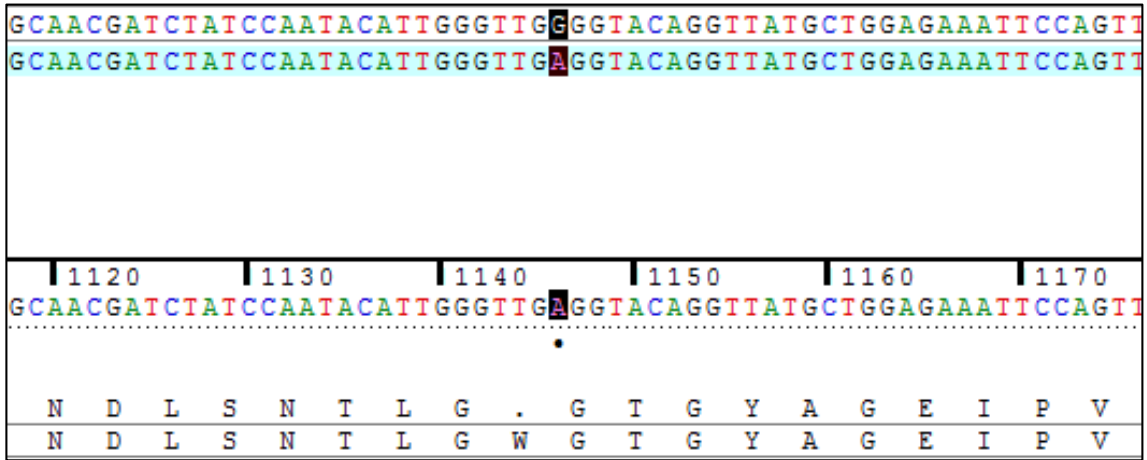

Reference base sequence  
 NCL38 base sequence

NCL38 amino acid sequence  
 Reference amino acid sequence

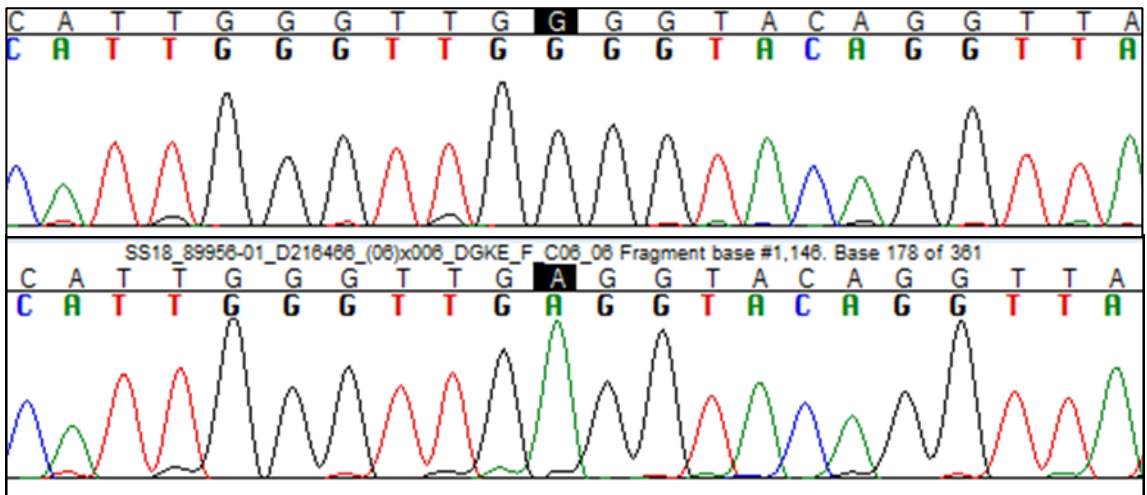

Reference sequence chromatogram

NCL38 chromatogram

DGKE c.966G>A p.(Trp322\*)

**K. NCL39. a. *DGKE* exon 3. b. *DGKE* exon 6.**

**a.**

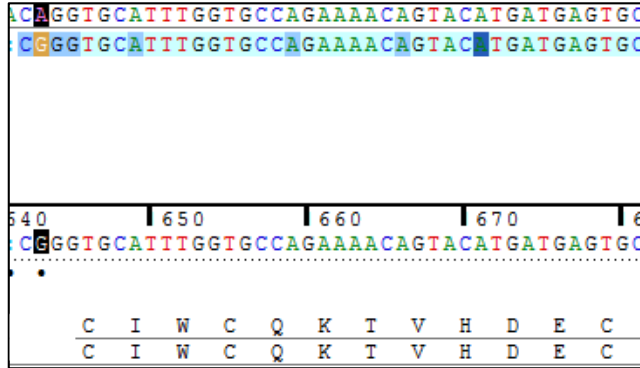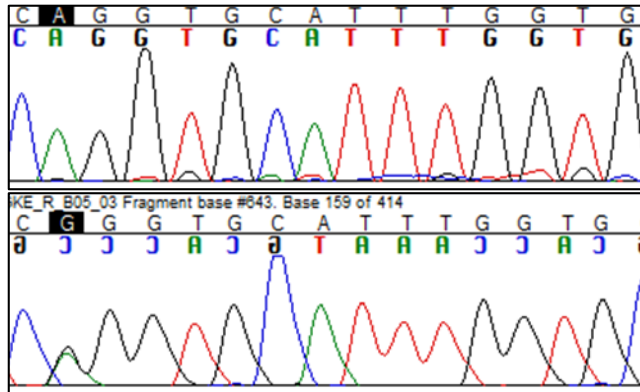

***DGKE* c.465-2A>G**

**b.**

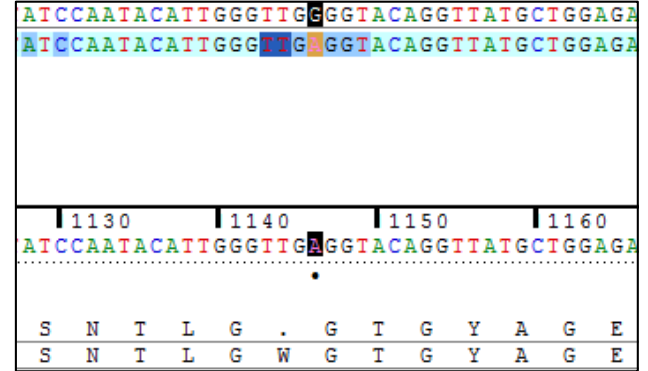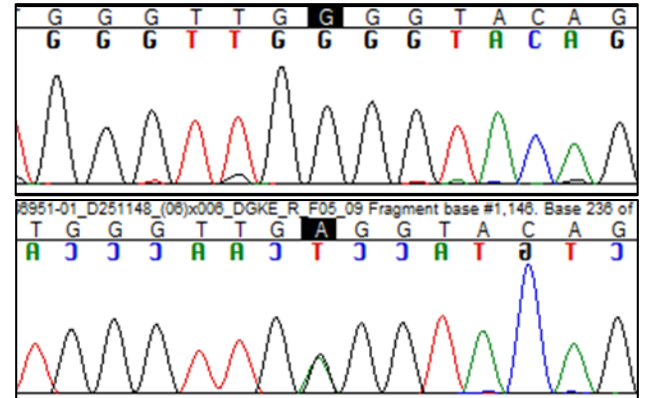

***DGKE* c.966G>A p.(Trp322\*)**

# L. NCL40. *DGKE* exon 6

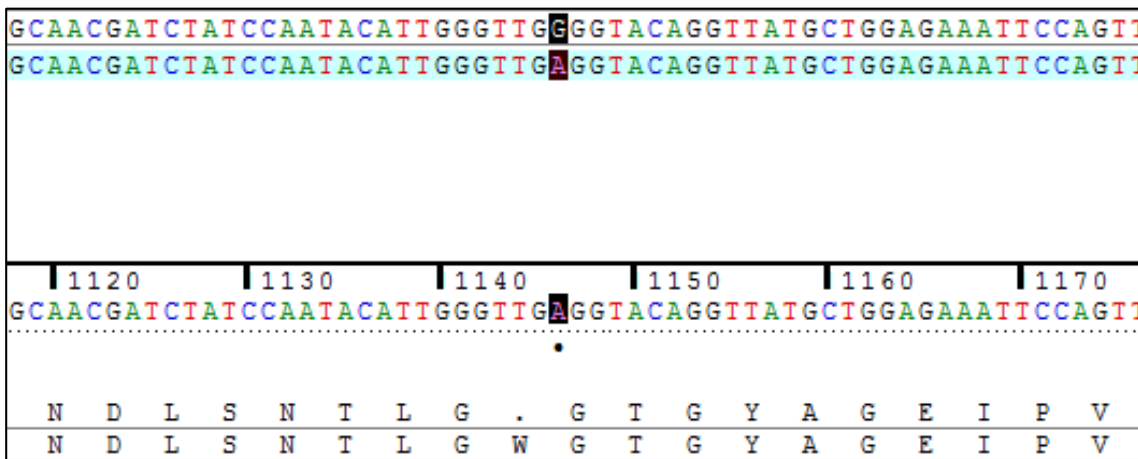

Reference base sequence

NCL40 base sequence

NCL40 amino acid sequence

Reference amino acid sequence

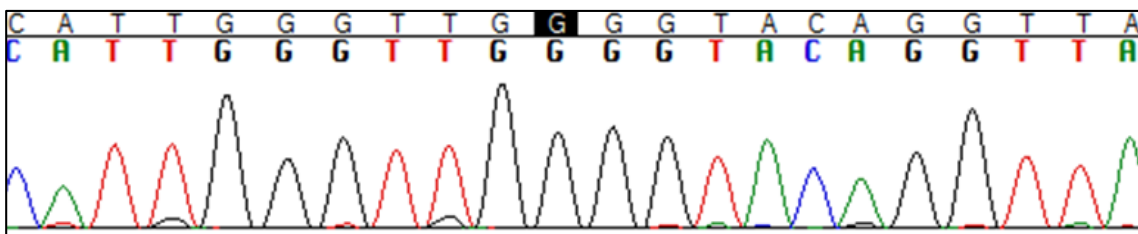

Reference sequence chromatogram

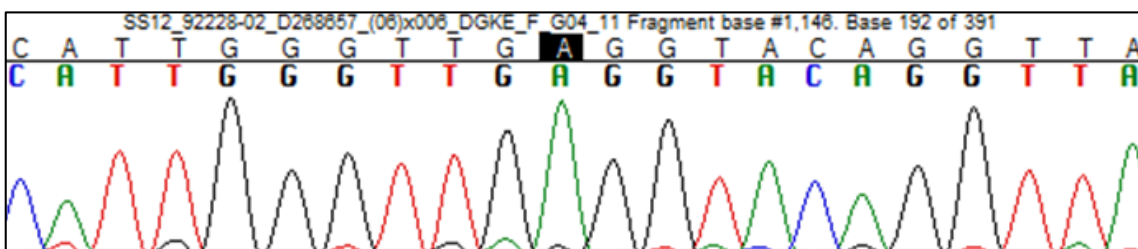

NCL40 chromatogram

*DGKE* c.966G>A p.(Trp322\*)

# Supplemental Figure 4: DGKE amino acid conservation alignments for newly described missense mutations

## A. NCL25. i. R155G. ii. L476P

i.

| Species       | Amino acid sequence |          |          |          |          |                        |          |          |          |          |          |
|---------------|---------------------|----------|----------|----------|----------|------------------------|----------|----------|----------|----------|----------|
| <b>NCL25</b>  | K<br>150            | L<br>151 | C<br>152 | D<br>153 | Y<br>154 | <b>G</b><br><b>155</b> | C<br>156 | I<br>157 | W<br>158 | C<br>159 | Q<br>160 |
| Human         | K                   | L        | C        | D        | Y        | R                      | C        | I        | W        | C        | Q        |
| Chimp         | K                   | L        | C        | D        | Y        | R                      | C        | I        | W        | C        | Q        |
| Gorilla       | K                   | L        | C        | D        | Y        | -                      | -        | -        | -        | -        | -        |
| Orangutan     | K                   | L        | C        | D        | Y        | R                      | C        | I        | W        | C        | Q        |
| Rhesus Monkey | K                   | L        | C        | D        | Y        | R                      | C        | I        | W        | C        | Q        |
| Mouse         | K                   | L        | C        | D        | Y        | R                      | C        | I        | W        | C        | Q        |
| Rat           | K                   | L        | C        | D        | Y        | R                      | C        | V        | W        | C        | Q        |
| Rabbit        | K                   | L        | C        | D        | Y        | R                      | C        | I        | W        | C        | Q        |
| Dolphin       | K                   | L        | C        | D        | Y        | R                      | C        | I        | W        | C        | Q        |
| Dog           | K                   | L        | C        | D        | Y        | R                      | C        | I        | W        | C        | Q        |
| Opossum       | K                   | L        | C        | D        | Y        | R                      | C        | I        | W        | C        | Q        |
| Platypus      | K                   | L        | C        | D        | Y        | R                      | C        | I        | W        | C        | Q        |
| Chicken       | K                   | L        | C        | D        | Y        | R                      | C        | V        | W        | C        | Q        |
| Zebrafish     | K                   | L        | C        | D        | Y        | R                      | C        | V        | W        | C        | Q        |

ii.

| Species       | Amino acid sequence |          |          |          |          |                        |          |          |          |          |          |
|---------------|---------------------|----------|----------|----------|----------|------------------------|----------|----------|----------|----------|----------|
| <b>NCL25</b>  | R<br>471            | H<br>472 | D<br>473 | D<br>474 | G<br>475 | <b>P</b><br><b>476</b> | L<br>477 | E<br>478 | V<br>479 | V<br>480 | G<br>481 |
| Human         | R                   | H        | D        | D        | G        | L                      | L        | E        | V        | V        | G        |
| Chimp         | R                   | H        | D        | D        | G        | L                      | L        | E        | V        | V        | G        |
| Gorilla       | R                   | H        | D        | D        | G        | L                      | L        | E        | V        | V        | G        |
| Orangutan     | R                   | H        | D        | D        | G        | L                      | L        | E        | V        | V        | G        |
| Rhesus Monkey | R                   | H        | D        | D        | G        | L                      | L        | E        | V        | V        | G        |
| Mouse         | R                   | H        | D        | D        | G        | L                      | L        | E        | I        | V        | G        |
| Rat           | R                   | H        | D        | D        | G        | L                      | L        | E        | V        | V        | G        |
| Rabbit        | R                   | H        | D        | D        | G        | L                      | L        | E        | V        | V        | G        |
| Dolphin       | R                   | H        | D        | D        | G        | L                      | L        | E        | V        | V        | G        |
| Dog           | R                   | H        | D        | D        | G        | L                      | L        | E        | V        | V        | G        |
| Opossum       | S                   | H        | D        | D        | G        | L                      | L        | E        | V        | V        | G        |
| Platypus      | R                   | H        | D        | D        | G        | L                      | L        | E        | V        | V        | G        |
| Chicken       | R                   | H        | D        | D        | G        | L                      | L        | E        | V        | V        | G        |
| Zebrafish     | <b>R</b>            | <b>V</b> | D        | D        | G        | L                      | L        | E        | V        | V        | G        |

## B. NCL27 and NCL29. T533P

| Species         | Amino acid sequence |          |          |          |          |                        |          |          |          |          |          |
|-----------------|---------------------|----------|----------|----------|----------|------------------------|----------|----------|----------|----------|----------|
| NCL27 and NCL29 | G<br>528            | P<br>529 | C<br>530 | T<br>531 | V<br>532 | <b>P</b><br><b>533</b> | I<br>534 | T<br>535 | H<br>536 | K<br>537 | T<br>538 |
| Human           | G                   | P        | C        | T        | V        | T                      | I        | T        | H        | K        | T        |
| Chimp           | G                   | P        | C        | T        | V        | T                      | I        | T        | H        | K        | T        |
| Gorilla         | G                   | P        | C        | T        | V        | T                      | I        | T        | H        | K        | T        |
| Orangutan       | G                   | P        | C        | T        | V        | T                      | I        | T        | H        | K        | T        |
| Rhesus Monkey   | G                   | P        | C        | T        | V        | T                      | I        | T        | H        | K        | T        |
| Mouse           | G                   | P        | C        | T        | V        | T                      | I        | T        | H        | K        | T        |
| Rat             | G                   | P        | C        | T        | V        | T                      | I        | T        | H        | K        | T        |
| Rabbit          | G                   | P        | C        | T        | V        | T                      | I        | T        | H        | K        | T        |
| Dolphin         | G                   | P        | C        | T        | V        | T                      | I        | T        | H        | K        | T        |
| Dog             | G                   | P        | C        | T        | V        | T                      | I        | T        | H        | K        | T        |
| Opossum         | G                   | P        | C        | I        | V        | T                      | I        | T        | H        | K        | T        |
| Platypus        | G                   | P        | C        | T        | V        | T                      | I        | T        | H        | K        | T        |
| Chicken         | G                   | P        | C        | T        | V        | T                      | I        | T        | H        | K        | T        |
| Zebrafish       | G                   | P        | C        | T        | I        | T                      | I        | T        | H        | K        | T        |

## C. NCL28. M1L

| Species       | Amino acid sequence |     |     |     |     |     |
|---------------|---------------------|-----|-----|-----|-----|-----|
| NCL36         | L 1                 | E 2 | A 3 | E 4 | R 5 | R 6 |
| Human         | M                   | E   | A   | E   | R   | R   |
| Chimp         | M                   | E   | A   | E   | R   | R   |
| Gorilla       | M                   | E   | A   | E   | R   | R   |
| Orangutan     | M                   | E   | A   | E   | R   | R   |
| Rhesus Monkey | M                   | E   | A   | E   | R   | R   |
| Mouse         | M                   | E   | G   | D   | Q   | R   |
| Rat           | M                   | E   | G   | D   | Q   | R   |
| Rabbit        | M                   | E   | G   | E   | R   | R   |
| Dolphin       | M                   | E   | G   | E   | K   | R   |
| Dog           | M                   | E   | A   | E   | R   | R   |
| Opossum       | M                   | E   | G   | R   | K   | Q   |
| Platypus      | M                   | E   | R   | G   | E   | P   |
| Chicken       | M                   | L   | P   | E   | A   | A   |
| Zebrafish     | M                   | E   | E   | N   | N   | E   |

## D. NCL30. N131K

| Species       | Amino acid sequence |          |          |          |          |                        |          |          |          |          |          |
|---------------|---------------------|----------|----------|----------|----------|------------------------|----------|----------|----------|----------|----------|
| NCL30         | H<br>126            | W<br>127 | I<br>128 | R<br>129 | G<br>130 | <b>K</b><br><b>131</b> | V<br>132 | P<br>133 | L<br>134 | C<br>135 | S<br>136 |
| Human         | H                   | W        | I        | R        | G        | N                      | V        | P        | L        | C        | S        |
| Chimp         | H                   | W        | I        | R        | G        | N                      | V        | P        | L        | C        | S        |
| Gorilla       | H                   | W        | I        | R        | G        | N                      | V        | P        | L        | C        | S        |
| Orangutan     | H                   | W        | I        | R        | G        | N                      | V        | P        | L        | C        | S        |
| Rhesus Monkey | H                   | W        | I        | R        | G        | N                      | V        | P        | L        | C        | S        |
| Mouse         | H                   | W        | I        | R        | G        | N                      | V        | P        | L        | C        | S        |
| Rat           | H                   | W        | I        | R        | G        | N                      | V        | P        | L        | C        | T        |
| Rabbit        | H                   | W        | I        | R        | G        | N                      | V        | P        | L        | C        | S        |
| Dolphin       | H                   | W        | I        | R        | G        | N                      | V        | P        | L        | C        | S        |
| Dog           | H                   | W        | I        | R        | G        | N                      | V        | P        | L        | C        | S        |
| Opossum       | H                   | W        | I        | R        | G        | N                      | V        | P        | L        | C        | S        |
| Platypus      | R                   | W        | I        | R        | G        | N                      | V        | P        | L        | C        | S        |
| Chicken       | H                   | W        | I        | R        | G        | N                      | V        | P        | L        | C        | S        |
| Zebrafish     | Q                   | W        | V        | K        | G        | N                      | V        | P        | L        | A        | S        |

## E. NCL32. Q79P

| Species       | Amino acid sequence |         |         |         |         |                |         |         |         |         |         |
|---------------|---------------------|---------|---------|---------|---------|----------------|---------|---------|---------|---------|---------|
| <b>NCL32</b>  | C<br>74             | C<br>75 | V<br>76 | C<br>77 | A<br>78 | <b>P</b><br>79 | H<br>80 | I<br>81 | L<br>82 | Q<br>83 | G<br>84 |
| Human         | C                   | C       | V       | C       | A       | Q              | H       | I       | L       | Q       | G       |
| Chimp         | C                   | C       | V       | C       | A       | Q              | H       | I       | L       | Q       | G       |
| Gorilla       | C                   | C       | V       | C       | A       | Q              | H       | I       | L       | Q       | G       |
| Orangutan     | C                   | C       | V       | C       | A       | Q              | H       | I       | L       | Q       | G       |
| Rhesus Monkey | C                   | C       | V       | C       | A       | Q              | H       | I       | L       | Q       | G       |
| Mouse         | C                   | C       | V       | C       | A       | Q              | H       | I       | L       | Q       | G       |
| Rat           | C                   | C       | V       | C       | A       | Q              | H       | I       | L       | Q       | G       |
| Rabbit        | C                   | C       | V       | C       | A       | Q              | H       | I       | L       | R       | G       |
| Dolphin       | C                   | C       | V       | C       | A       | Q              | H       | I       | L       | Q       | G       |
| Dog           | C                   | C       | V       | C       | A       | Q              | H       | I       | L       | L       | G       |
| Opossum       | C                   | C       | V       | C       | T       | Q              | H       | I       | L       | Q       | G       |
| Platypus      | C                   | C       | L       | C       | A       | Q              | H       | I       | L       | R       | G       |
| Chicken       | C                   | C       | V       | C       | A       | Q              | H       | I       | L       | R       | G       |
| Zebrafish     | C                   | C       | V       | C       | C       | Q              | P       | I       | L       | Q       | G       |

## F. NCL37. C108Y

| Species       | Amino acid sequence |          |          |          |          |                 |          |          |          |          |          |
|---------------|---------------------|----------|----------|----------|----------|-----------------|----------|----------|----------|----------|----------|
| <b>NCL37</b>  | D<br>103            | K<br>104 | R<br>105 | F<br>106 | Q<br>107 | <b>Y</b><br>108 | K<br>109 | E<br>110 | I<br>111 | M<br>112 | L<br>113 |
| Human         | D                   | K        | R        | F        | Q        | C               | K        | E        | I        | M        | L        |
| Chimp         | D                   | K        | R        | F        | Q        | C               | K        | E        | I        | M        | L        |
| Gorilla       | D                   | K        | R        | F        | Q        | C               | K        | E        | I        | M        | L        |
| Orangutan     | D                   | K        | R        | F        | Q        | C               | K        | E        | I        | M        | L        |
| Rhesus Monkey | D                   | R        | R        | F        | Q        | C               | K        | E        | I        | M        | L        |
| Mouse         | D                   | K        | R        | F        | P        | C               | K        | E        | I        | M        | L        |
| Rat           | D                   | K        | R        | F        | P        | C               | K        | E        | I        | M        | L        |
| Rabbit        | D                   | R        | R        | F        | A        | C               | K        | E        | I        | V        | L        |
| Dolphin       | D                   | K        | R        | F        | H        | C               | K        | E        | I        | M        | L        |
| Dog           | D                   | K        | R        | F        | P        | C               | K        | E        | I        | M        | L        |
| Opossum       | D                   | R        | Q        | F        | Q        | C               | K        | E        | I        | M        | L        |
| Platypus      | D                   | R        | R        | F        | P        | C               | K        | E        | I        | M        | L        |
| Chicken       | D                   | Q        | H        | F        | L        | C               | K        | E        | I        | V        | M        |
| Zebrafish     | D                   | R        | I        | L        | S        | C               | K        | E        | I        | M        | T        |

**Supplemental Table 1: *In silico* analysis of newly described missense *DGKE* mutations**

| Patient      | Inheritance           | DGKE variant                           | ESP frequencies | Align GVGD                        | SIFT                      | MutationTaster               |
|--------------|-----------------------|----------------------------------------|-----------------|-----------------------------------|---------------------------|------------------------------|
| <b>NCL25</b> | Compound heterozygous | c.463A>G p.(Arg155Gly)¶                | N/A             | Class C65 (GV: 0.00 - GD: 125.13) | Deleterious (score: 0)    | Disease causing (p-value: 1) |
|              |                       | c.1427T>C p.(Leu476Pro)¶               | N/A             | Class C45 (GV: 14.30 - GD: 86.59) | Deleterious (score: 0.01) | Disease causing (p-value: 1) |
| <b>NCL26</b> | Homozygous            | c.826delG p.(Val276Phefs*8)¶           | N/A             | NA: frameshift                    |                           |                              |
| <b>NCL27</b> | Homozygous            | c.1597A>C p.(Thr533Pro)¶               | N/A             | Class C0 (GV: 121.10 - GD: 28.88) | Tolerated (score: 0.23)   | Disease causing (p-value: 1) |
| <b>NCL28</b> | Homozygous            | c.1A>T p.(Met1Leu)¶                    | N/A             | NA: start loss                    |                           |                              |
| <b>NCL29</b> | Homozygous            | c.1597A>C p.(Thr533Pro) ¶              | N/A             | Class C0 (GV: 121.10 - GD: 28.88) | Tolerated (score: 0.23)   | Disease causing (p-value: 1) |
| <b>NCL30</b> | Compound heterozygous | c.393C>G p.(Asn131Lys)¶                | N/A             | Class C65 (GV: 0.00 - GD: 93.88)  | Deleterious (score: 0)    | Disease causing (p-value: 1) |
|              |                       | c.465-2A>G ¶                           | N/A             | NA: splice site                   |                           |                              |
| <b>NCL32</b> | Homozygous            | c.236A>C p.(Gln79Pro)¶                 | N/A             | Class C0 (GV: 261.33 - GD: 0.00)  | Tolerated (score: 0.14)   | Disease causing (p-value: 1) |
| <b>NCL34</b> | Homozygous            | c.1647_1650delAACA p.(Thr550Metfs*13)¶ | N/A             | NA: frameshift                    |                           |                              |
| <b>NCL37</b> | Homozygous            | c.323G>A p.(Cys108Tyr)¶                | N/A             | Class C65 (GV: 0.00 - GD: 193.72) | Deleterious (score: 0)    | Disease causing (p-value: 1) |

**Abbreviations:** DGKE, diacyl glycerol kinase  $\epsilon$ ; ESP, Exome Sequencing Project; GVGD, Grantham Variation Grantham Difference; NA, not applicable; N/A, not available; SIFT, Sorting Tolerant From Intolerant.



## Supplemental Figure 5: Kaplan Meier Survival Curves

### A. Renal survival comparing individuals who received eculizumab with those who did not

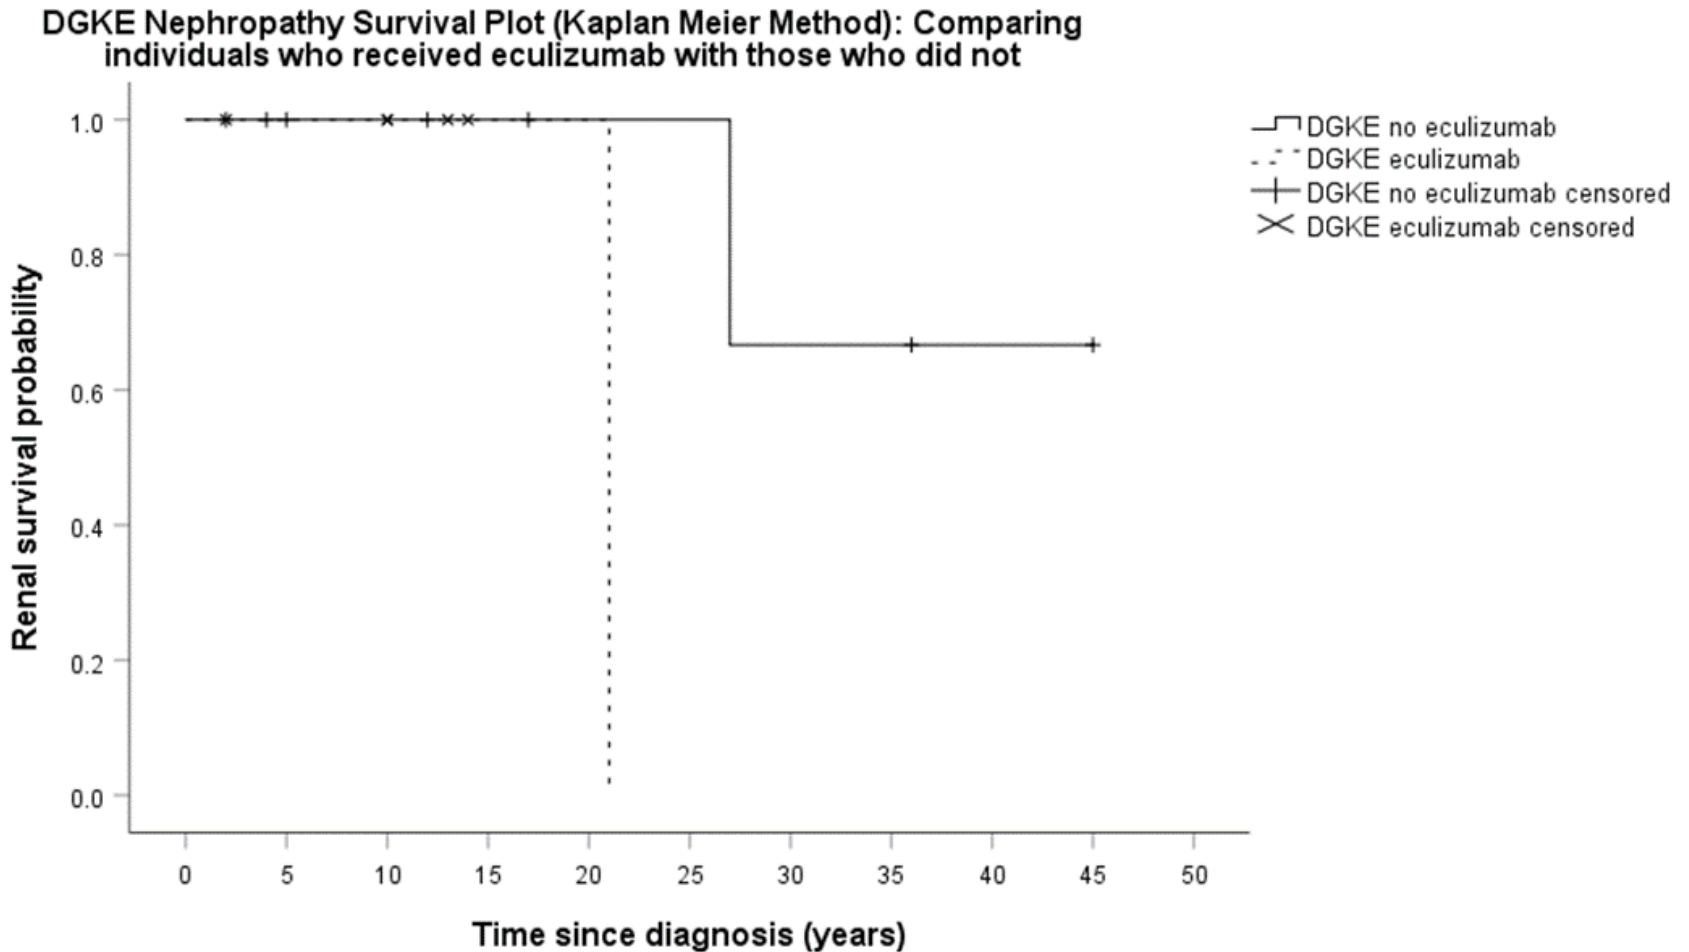

## B. Renal and patient survival, including individuals for whom no genetic analysis was possible

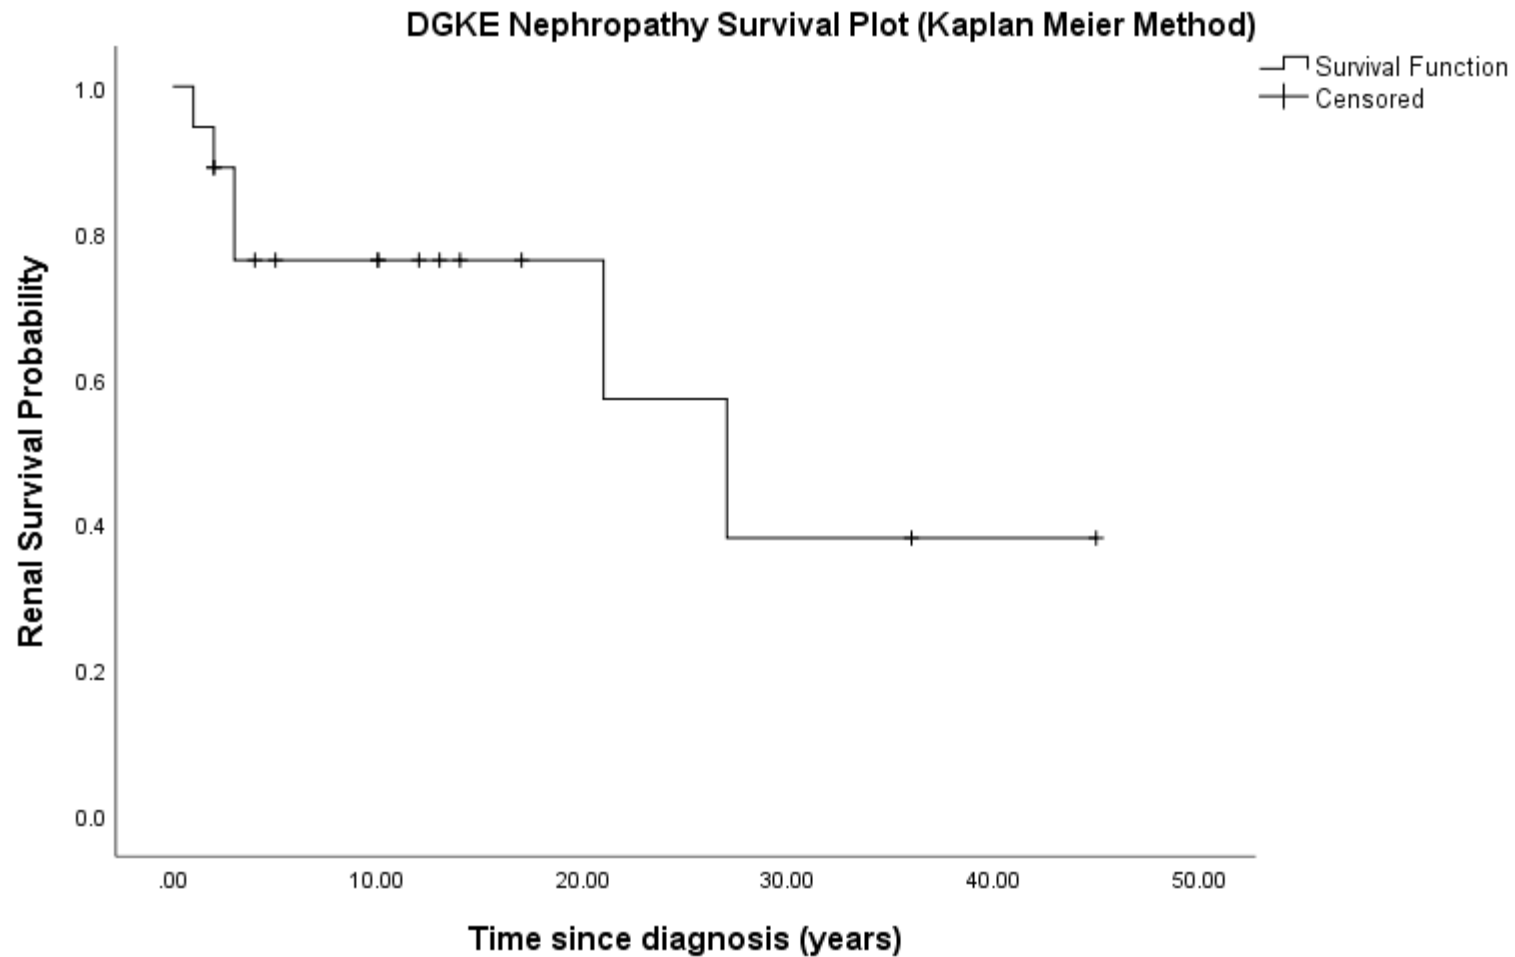

### C. Renal and patient survival, including individuals for whom no genetic analysis was possible, comparing individuals who received eculizumab with those who did not

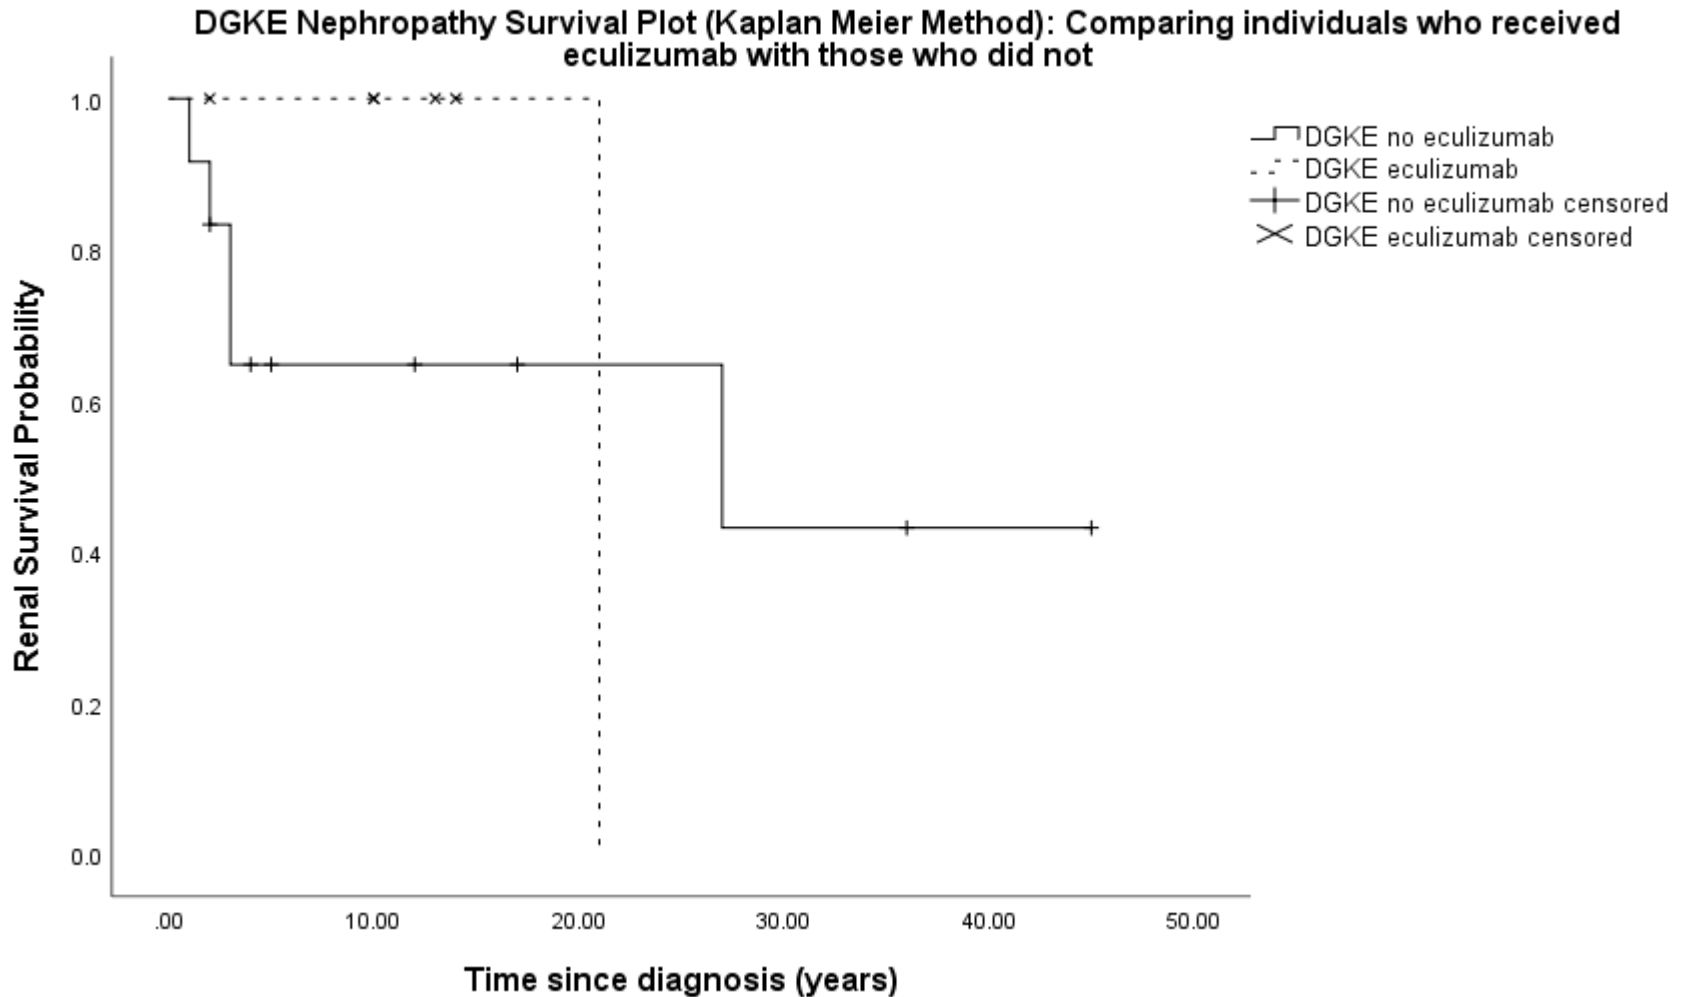

## D. Renal survival, incorporating data published by Azukaitis et al., for all published DGKA nephropathy cases

DGKE Nephropathy Survival Plot (Kaplan Meier Method): Combining our data with data previously published by Azukaitis et al. (JASN, 28: 3066-3075, 2017)

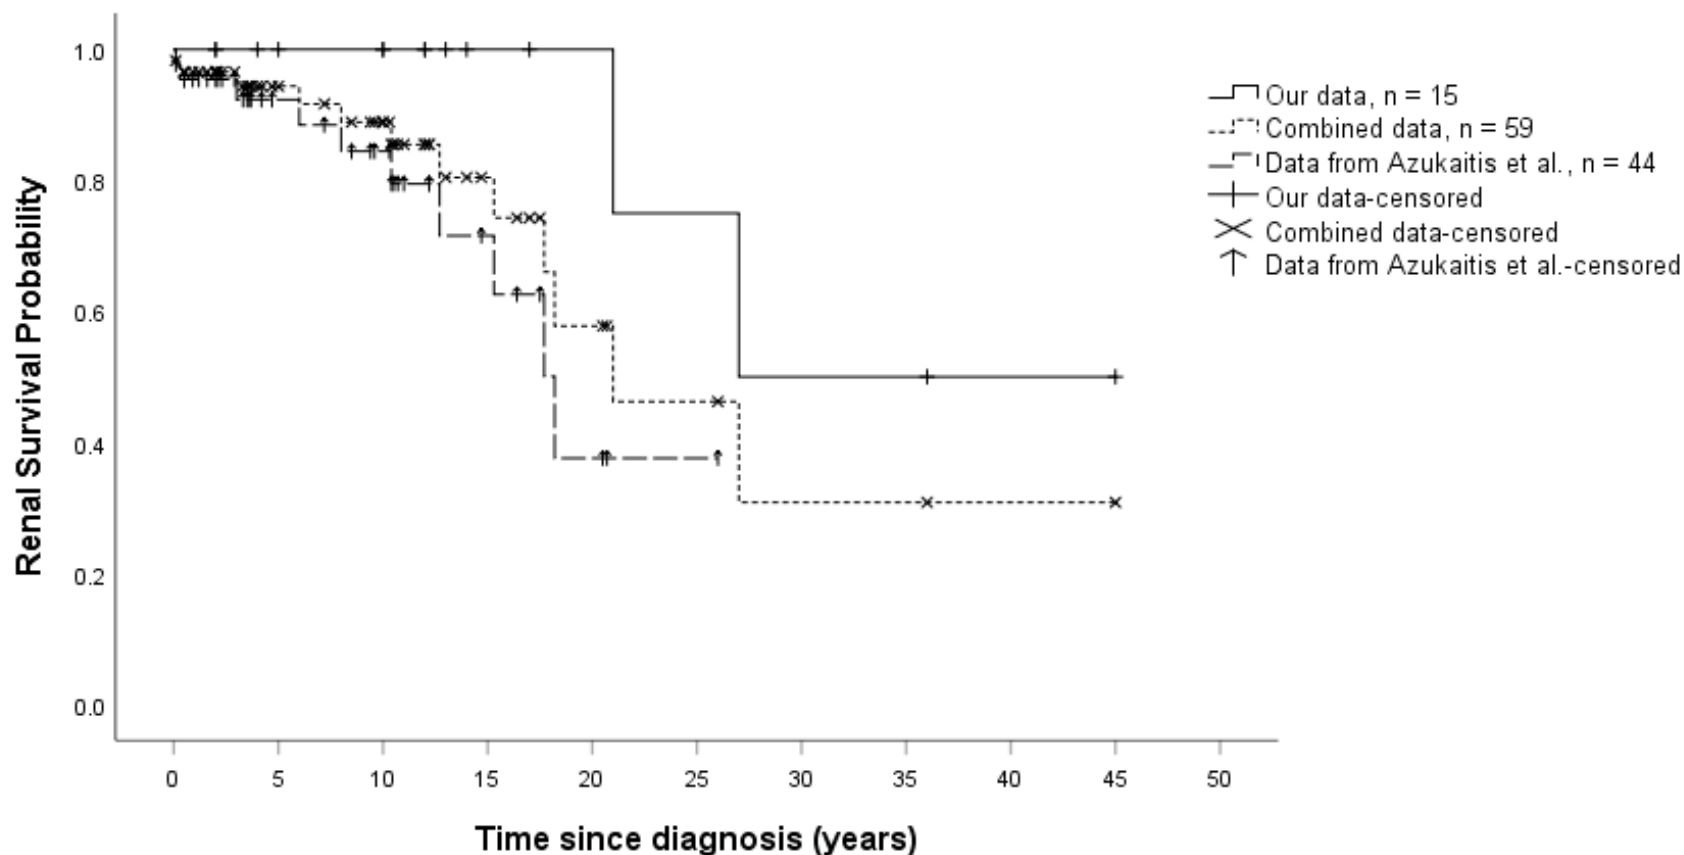

# Supplemental Figure 6: Primer design for RNA studies

## A. c.1524+2T>C

CTCCAGCTCGCGGCCCGCGCGCCGGATCGGCGTGCCTGCGGCTGGAGCCTTAAGCGTTTCCCCCGCC  
CGGCTTCATCCCTGCTGGCGGCCAGCGTCGTTCTCCTCCTGCGCGAGGCGGCCAAGGCCTGCTGGCC  
CGGAGCCGCGCCTCCACCCGCGCAGGATCGTCTGGAGAAAGATGGAAGCGGAGAGGCGGCCGCG  
CCGGGCTCGCCCTCCGAGGGCCTGTTTGCAGGACGGGCACCTGATCTTGTGGACGCTGTGCTCGGTCT  
GCTGCCGCTGTTTCATCACCTTCTGGTGTAGCCTCCAGCGGTGCGCGCCGAGCTGCACCGCAGGGACA  
TCTTCCGCAAGAGCAAGCACGGGTGGCGCGACACGGACCTGTTTCCAGCCAGCCACCTACTGCTGCGTG  
TGC GCGCAGCACATTCTGCAGGGCGCCTTCTGCGACTGCTGCGGGCTCCGCGTGGACGAGGGCTGCCT  
CAGGAAGGCCGACAAGCGCTTCCAGTGCAAGGAGATTATGCTCAAGGAATGACACCAAGGTCCTGGACG  
CCATGCCCCACCACTGGATCCGGGGCAACGTGCCCTGTGCAGTTACTGTATGGTTTGCAAGCAGCAG  
TGTGGCTGTCAACCAAGCTTTCGATTACAGGTGCATTTGGTGCCAGAAAACAGTACATGATGAGTG  
CATGAAAAATAGTTTTAAAGAATGAAAAATGTGATTTTGGAGAATTCAAAAACCTAATCATTCCACCAA  
GTTATTTAACATCCATTAATCAGATGCGTAAAGACAAAAAACAGATTATGAAGTGCTAGCCTCTAAG  
CTTGGAAAGCAGTGGACCCATTAATAATCCTGGCCAACTCTCGTAGTGGAACTAATATGGGAGAAGG  
ACTGTTGGGAGAATTTAGGATCTTGTGTAATCCAGTCCAGGTTTTTGTGATGTAACATAAACTCCTCCTA  
TCAAAGCCCTACAACTCTGTACTCTTCTCCATATTATCAGCTCGAGTACTTGTGTTGGAGGGGAT  
GGGACTGTAGGGTGGTCTTGATGCAGTTGATGACATGAAGATTAAGGGACAAGAAAAGTACATTCC  
ACAAGTTGCAGTTTTGCCTCTGGGAACAGGCAACGATCTATCCAATACATTGGGTTGGGGTACAGGTT  
ATGCTGGAGAAATCCAGTTGCGCAGGTTTTGCGAAATGTAATGGAAGCAGATGGAATTAACTAGAT  
CG

exon 1 - 162 bp  
exon 2 - 482 bp  
exon 3 - 160 bp  
exon 4 - 120 bp  
exon 5 - 144 bp  
exon 6 - 158 bp

predict exon 3 del - 318 bp  
WT - 478 bp

DGKE\_RNA\_Ex2-5f gtagcgcgacggccagtgAATGACACCAAGGTCCTGG  
DGKE\_RNA\_Ex2-5r cagggcgcagcgatgacTGTAGGGCTTTGATAGGAGG

## B. c.465-2A>G

BCGGTTTACTTATTCTATGGAACCAAAGATTGTTTAGTGCAAGAATGTAAGATTGAATAAAAAAGTTGAGCTA  
GAACTGGATGGTGAGCGAGTAGCACTGCCAGCTTGGAAAGGTATTATAGTTCTGAACATCGGATACTGGGGCGGT  
GGCTGCAGACTATGGGAAGGGATGGGGGACGAGACTTACCCTCTAGCCAGGCATGACGATGGTCTGCTGGAAGTC  
GTTGGAGTATATGGGTCTTTCCACTGTGCTCAGATTCAAGTAAACTGGCTAATCCTTTTCGAATAGGACAGGCA  
CATACAGTGAGGCTGATTTTGAAGTGCTCCATGATGCCAATGCAGGTGGATGGGGAGCCTTGGGCCCAAGGGCCC  
TGCACGTGCACCATAAACTCACAAGACACATGCAATGATGTTATATTTCTCTGGAGAACAAACAGATGATGACATC  
TCTAGTACTTCCGATCAAGAAGATATAAAGGCGACTGAATAGATGGATGAGGGAGTGAAAACTTTGCATAGAATC  
CTCACGCAAGTAGATACATGTTTCATCCAAAAGTATTAATAGAAATTCTCTATCAGCTATTCAGTCTTAATTCAC  
TAGTAGTATAATGGGTATACATTTTTGTAAATAGCATCCCCAAACCAGCCAGCCTTCAGTTATTTACAAATGTTT  
GTTCTTTTTTTCAGCAAAATACTTCAAATGAATAGTATTAACCTTACAAAAAGTCACAAAACTTACATGAGAGTGA  
AAATTTGTTATGACTGTTTTGAGAGTGGGACTCACTCTGAAGTATGTGCTGTCTCATGTCTTATTTTTGAACCAT  
GCATATGATGGACACACAATGGATGGACACATTATATCTCCAACAAGGTGTGGGTGGAAAGATCAAATTAACCTG  
CTTTTTTGAAGGAAATGATTACTGTCAAACCAGCATGGTTAATTTGTGAGCATCTCC

predicted to lose exon 11 = 112bp or get an extra 4 bases on end of exon 11

Expected product

WT = 428 bp

first 43 bases exon 10 to exon 12 = 215 bp

inclusion of intron 11 = 788 bp

DGKE\_RNA\_Ex9f gtagcgcgacggccagtGGAACCAAAGATTGTTTAGTGC

DGKE\_Ex10\_12f gtagcgcgacggccagtTGGATGGTGAGCGAGTAGC

DGKE\_Ex10\_12r cagggcgcagcgatgacTCATTGCATGTGTCTTGTGAG
